20 **Abstract**

21 Interferons (IFNs), produced during viral infections, induce the expression of hundreds of IFN-  
22 stimulated genes (ISGs). Some ISGs have specific antiviral activity while others regulate the cellular  
23 response. Besides functioning as an antiviral effector, IFN-stimulated gene 15 (ISG15) is a negative  
24 regulator of IFN signalling and inherited ISG15-deficiency leads to autoinflammatory  
25 interferonopathies where individuals exhibit elevated ISG expression in the absence of pathogenic  
26 infection. We have recapitulated these effects in cultured human A549-ISG15<sup>-/-</sup> cells and (using  
27 A549-UBA7<sup>-/-</sup> cells) confirmed that posttranslational modification by ISG15 (ISGylation) is not  
28 required for regulation of the type-I IFN response. ISG15-deficient cells pre-treated with IFN- $\alpha$  were  
29 resistant to paramyxovirus infection. We also showed that IFN- $\alpha$  treatment of ISG15-deficient cells  
30 led to significant inhibition of global protein synthesis leading us to ask whether resistance was due  
31 to the direct antiviral activity of ISGs or whether cells were non-permissive due to translation  
32 defects. We took advantage of the knowledge that IFN-induced protein with tetratricopeptide  
33 repeats 1 (IFIT1) is the principal antiviral ISG for parainfluenza virus 5 (PIV5). Knockdown of IFIT1  
34 restored PIV5 infection in IFN- $\alpha$ -pre-treated ISG15-deficient cells, confirming that resistance was due  
35 to the direct antiviral activity of the IFN response. However, resistance could be induced if cells were  
36 pre-treated with IFN- $\alpha$  for longer times, presumably due to inhibition of protein synthesis. These  
37 data show that the cause of virus resistance is two-fold; ISG15-deficiency leads to the 'early' over-  
38 expression of specific antiviral ISGs, but the later response is dominated by an unanticipated, ISG15-  
39 dependent, loss of translational control.

40 **Key points**

41 Cell culture model of ISG15-deficiency replicate findings in ISG15<sup>-/-</sup> patient cells  
42 Cause of resistance in ISG15<sup>-/-</sup> cells differs depending on duration of IFN treatment  
43 ISG15<sup>-/-</sup> patients without serious viral disease don't prove ISGylation is unimportant

## 44 **Introduction**

45 The innate immune response against pathogens is underpinned by the evolutionary conserved  
46 interferon (IFN) system. All cells express pathogen recognition receptors (PRRs) that sense the  
47 products of infection and establish a signalling cascade leading to the production of cytokines,  
48 including type I IFN (IFN- $\alpha/\beta$ ) (1, 2). IFN is secreted from cells and binds to cell surface receptors  
49 expressed on both infected and non-infected cells, initiating a Janus kinase/signal transducer and  
50 activator of transcription (JAK/STAT) signalling cascade, culminating in the expression of hundreds of  
51 interferon stimulated genes (ISGs) (3). The biological effects of ISGs are extensive and their principle  
52 role is to generate an unfavourable environment for the replication of viruses. Many ISGs have  
53 broad antiviral activity, such as double-stranded RNA dependent protein kinase (PKR) that, upon  
54 recognition of viral dsRNA, dampens general protein synthesis and prevents the translation of viral  
55 mRNAs (4). Other antiviral ISGs, such as IFN-induced protein with tetratricopeptide repeats (IFIT)  
56 proteins, inhibit specific viruses, but for many, they are inconsequential (5). Additionally, multiple  
57 ISGs are generally required to limit infection because the majority of ISGs result in low to moderate  
58 levels of inhibition (6); however, ISGs with specific antiviral properties for a given virus are often not  
59 known. Nevertheless, the nature of the innate immune response necessitates the production of the  
60 complete spectrum of ISGs, albeit with a high degree of redundancy, as during a natural infection,  
61 the identity of the infecting virus is not known. This response is inevitably tightly regulated, as a  
62 dysregulated response leads to a suite of autoinflammatory diseases (7).

63 The ubiquitin-like protein (Ubl) ISG15 is strongly induced by IFN and is critical for regulating how cells  
64 respond to infection. As a posttranslational modification (PTM), it can covalently modify proteins in a  
65 process known as ISGylation, and in many cases, modification of viral proteins forms part of the  
66 antiviral response (8). Covalently bound ISG15 can also be removed from proteins by the ubiquitin  
67 specific protease 18 (USP18) (9). Importantly, loss-of-function mutations in ISG15 have been  
68 identified in human patients with subsets of autoinflammatory interferonopathies and typically

69 these individuals demonstrate elevated ISG expression in the absence of pathogenic infection (10).  
70 Mechanistically, it was shown that ISG15 functions as a negative regulator of type I IFN signalling by  
71 stabilising USP18, a known inhibitor of JAK/STAT signalling (11-13). Intriguingly, despite the known  
72 functions of ISG15 and USP18 in the ISGylation process, the regulation of type I IFN signalling was  
73 entirely independent of ISGylation (10). Interestingly, mouse *Isg15* is not required to stabilise *Usp18*  
74 and appears not to be needed to regulate IFN signalling, suggesting a species-specific, gain-of-  
75 function for human ISG15 (14).

76 Previous work has shown that cells from ISG15-deficient patients expressed higher levels of ISGs  
77 compared to normal controls when treated with recombinant IFN- $\alpha$  and these cells were resistant to  
78 several viruses (14); however, it was not clear at what stage of infection viruses were blocked nor  
79 how. Furthermore, cells were treated with IFN- $\alpha$  followed by washing (to remove IFN) and rested for  
80 36 hours prior to infection. Since ISG15 is involved in regulating the cell cycle (15) and protein  
81 synthesis (shown in this report), an over-amplified IFN response (due to lack of ISG15 and reduced  
82 levels of USP18) may have led to virus resistance simply because cells were no longer permissive to  
83 infection. This has implications for our understanding as to why ISG15-deficient patients are not  
84 more susceptible to viral infections; these observations have led to the suggestion that, unlike in  
85 mice, human ISG15 is not an antiviral effector (14, 16).

86 In this study, we recapitulated the phenotype observed in ISG15-deficient patient cells upon  
87 treatment with recombinant IFN- $\alpha$  in a cell culture model and dissected the mechanisms that result  
88 in virus resistance during an antiviral state. We showed that resistance was due to the direct  
89 antiviral activity of the type I IFN response and discuss the implications of ISG15-loss-of-function  
90 during the innate immune response. Based on our findings, we conclude that observations from  
91 ISG15-deficient patients alone cannot be used to infer that ISG15 does not possess antiviral effector  
92 functions, as has been proposed (14, 16).

93

## 94 **Materials and methods**

### 95 **Cells**

96 Vero cells (African green monkey kidney epithelial cells) and A549 cells (human adenocarcinoma  
97 alveolar basal epithelial cells), and derivatives, were maintained in Dulbecco's modified Eagles's  
98 medium (DMEM; Sigma) supplemented with 10% (v/v) heat-inactivated foetal bovine serum (FBS,  
99 Biowest) and incubated in 5% (v/v) CO<sub>2</sub> at 37°C in a humidified incubator. A549-shIFIT1 have been  
100 described elsewhere (17) and were maintained in blasticidin (10 µg/ml). A549-ISG15<sup>-/-</sup> cells were  
101 generated by CRISPR/Cas9n system that utilises the D10A dual 'nickase' mutant of Cas9 (Cas9n) that  
102 ostensibly limits off-target effects. Briefly, to disrupt exon 2 of the ISG15 gene, single guide RNA  
103 (sgRNA) sequences were cloned using pPX460 and transfected into A549 cells as previously  
104 described (18). Transfectants were enriched by treating cells with puromycin (1 µg/ml) for 2 d and  
105 then diluted to single cells in 96-well plates. Correctly edited cell clones were verified by immunoblot  
106 analysis. A549-ISG15<sup>-/-</sup>-shIFIT1 cells were generated as previously described using A549-ISG15<sup>-/-</sup> (B8)  
107 and maintained in media with blasticidin (10 µg/ml) (17). To generate A549-UBA7<sup>-/-</sup> cells, A549 cells  
108 were first made to stably express *Streptococcus pyogenes* Cas9 following blasticidin selection of cells  
109 transduced with lentiCas9-Blast (gift from Feng Zhang, Addgene plasmid # 52962 (19)). The sgRNA  
110 sequence that targeted exon 3 of UBA7 was chosen computationally (<https://www.deskgen.com>)  
111 and complementary oligonucleotides (sense: caccGCACACGGGTGACATCACTG; antisense:  
112 aaacCAGTGATGTCACCCGTGTGC) were hybridised and ligated into the *Bsm* BI site of pLentiGuide-  
113 Puro (gift from Feng Zhang, Addgene # 52963 (20)). Cas9-expressing A549s were transduced with  
114 UBA7 sgRNA-expressing lentiGuide-Puro and selected with puromycin. Puromycin-resistant cells  
115 were single-cell cloned by FACS and successful knockout cells were validated by immunoblot  
116 analysis. A549-Npro cells have been described previously (21).

### 117 **Virus infections and treatments.**

118 Viruses used were human parainfluenza virus 2 (HPIV2) strain Colindale (HPIV2-Co), HPIV3 strain  
119 Washington/47885/57 (HPIV3-Wash) (20), PIV5 strain W3 (PIV5-W3) (22) and PIV5 strain CPI- (PIV5-  
120 CPI-) (23). Virus stocks were prepared by inoculating Vero cells at a multiplicity of infection (MOI) of  
121 0.001 with continual rocking at 37°C. Supernatants were harvested at 2 d p.i., clarified by  
122 centrifugation at 3,000 xg for 15 min, aliquoted and snap frozen. Titres were estimated by standard  
123 plaque assay on Vero cells in 6-well plates.

124 For infection studies, cell monolayers were infected in 6-well plates with virus diluted in medium to  
125 achieve a MOI of 10, unless stated otherwise. Virus adsorption was for 1 h, after which the viral  
126 inoculum was removed and replaced with media supplemented with 2% (v/v) FBS and incubated in  
127 5% (v/v) CO<sub>2</sub> at 37°C until harvested. When cells were treated with IFN- $\alpha$  prior to infection (pre-  
128 treated) this was done with 1000 IU/ml IFN- $\alpha$ 2b (referred to as IFN- $\alpha$  from here on; IntronA, Merck  
129 Sharp & Dohme Ltd.) 18 h prior to infection, unless otherwise stated. IFN- $\alpha$  remained on cells for the  
130 duration of experiments. Cells were either processed for immunoblot analysis or (if infecting with  
131 rPIV5-mCherry, kind gift of Dr He, University of Georgia, USA) imaged using an IncuCyte Zoom  
132 imaging system (Sartorius).

133 For plaque assays 30-40 PFU PIV5-CPI- in 1 ml DMEM, 2% FBS were adsorbed for 1 h onto confluent  
134 monolayers of cells in 6-well plates while rocking at 37°C. Following adsorption, 2 ml overlay  
135 (DMEM, 2% FBS, Avicel) was added to wells and incubated for 6 d. Cells were fixed with 5%  
136 formaldehyde (10 min), washed in PBS and either stained for 10 min with 1 mg/ml toluidine blue O  
137 (Sigma) followed by rinses with water or permeabilised for 10 min (PBS, 1% Triton X-100, 3% FBS)  
138 washed again and incubated for 1 h with a pool of PIV5-specific antibodies (24) or mouse  
139 monoclonal anti-HPIV3 NP (25) diluted in PBS, 3% FBS (1:1000). Following PBS washes, cells were  
140 incubated for 1 h with goat anti-mouse IgG antibodies conjugated to alkaline phosphatase (Abcam  
141 Cat# ab97020) diluted 1:1000 in PBS, 3%FBS. Cells were washed in PBS and signals were detected  
142 using SIGMAFAST BCIP/NBT (Sigma).

143 **Reverse transcription quantitative PCR.**

144 To quantify ISG expression, total cellular RNA was purified from cells that had been treated with  
145 1000 IU/ml IFN- $\alpha$  for 18 h, or left untreated, using TRIzol reagent (ThermoFisher Scientific) and  
146 Direct-zol RNA Miniprep Plus kits followed by on-column DNase I treatment for the removal of  
147 contaminating DNA (Zymo Research). To measure PIV5-W3 transcription, the indicated cells were  
148 treated with 1000 IU/ml IFN- $\alpha$ 2b for 8 h and then infected with PIV5 (MOI 10). Following adsorption  
149 for 1 h at 37°C, cells were lysed in TRIzol at the indicated times and RNA was purified as above.  
150 Complementary DNA (cDNA) was synthesised in 20  $\mu$ l reaction volumes with 500 ng (ISGs) or 100 ng  
151 (PIV5-infected cells) total RNA and oligo(dT) using GoScript reverse transcriptase (Promega)  
152 according to the manufacturer's recommendations. Quantitative PCR reaction mixes (20  $\mu$ l) included  
153 1x PerfeCTa SYBR green SuperMix (Quanta BioScience), 0.5  $\mu$ M each primer and 1  $\mu$ l cDNA reaction  
154 mix. Cycling was performed in a Mx3005P real time PCR machine (Stratagene) and included an initial  
155 3 min enzyme activation step at 95°C, followed by 40 cycles of 10 s at 95°C, 10 s at 58°C and 20 s at  
156 72°C. Melting curve analysis was performed to verify amplicon specificity. Quantification of  $\beta$ -*ACTIN*  
157 mRNA was used to normalize between samples and the average cycle threshold (CT) was  
158 determined from three independent cDNA samples from independent cultures. Relative expression  
159 compared to non-treated control cells was calculated using the  $\Delta\Delta$ CT method. Primer sequences  
160 were: *HERC5* 5'GACGAACTCTTGACCGTCTC and 5'GCGTCCACAGTCATTTCCAC, *USP18*  
161 5'ATGCTGCCCAACTGTACCTC and 5'CCTGCAGTCTCTCCACCAAG, *MxA* 5'GCCTGCTGACATTGGGTATAA  
162 and 5'CCCTGAAATATGGGTGGTTCTC, *IFIT1* 5'CCTGGAGTACTATGAGCGGGC and  
163 5'TGGGTGCCTAAGGACCTTGTC, PIV5 *NP* 5'AGGGTAGAGATCGATGGCT and  
164 5'GTCTGACCACCATTCCCTT,  $\beta$ -*ACTIN* 5'AGCGAGCATCCCCAAAGTT and  
165 5'AGGGCACGAAGGCTCATCATT.

166 **Immunoblotting.**

167 Confluent monolayers in 6-well dishes were lysed with 250  $\mu$ l 2 x Laemmli sample buffer (4% w/v  
168 SDS, 20% v/v glycerol, 0.004% w/v bromophenol blue and 0.125 M Tris-HCl, pH 6.8 with 10% v/v  $\beta$ -  
169 mercaptoethanol) for 10 min, incubated at 95°C for 10 min, sonicated at 4°C with 3 cycles of 30 s on  
170 30 s off in a Bioruptor Pico (Diagenode) and clarified by centrifugation at 12,000 xg, 4°C for 10 min.  
171 SDS-PAGE in Tris-glycine-SDS running buffer and immunoblotting followed standard techniques  
172 using the following antibodies: mouse monoclonal anti-ISG15 F-9 (Santa Cruz Biotechnology Cat#  
173 sc166755), rabbit polyclonal anti-MxA (Proteintech Cat# 13750-1-AP), goat polyclonal anti-IFIT1 N-16  
174 (Santa Cruz Biotechnology Cat# sc82946), mouse monoclonal anti- $\beta$ -ACTIN, UBA7 (anti-UBE1L B-7;  
175 Santa Cruz Biotechnology Cat# sc-390097), rabbit monoclonal anti-phosphorylated STAT1 (anti-  
176 phospho-STAT1 (Tyr701) 58D6; Cell Signalling Technology Cat# 9167), mouse monoclonal anti-PIV5  
177 NP 125 (24), mouse monoclonal anti-HPIV2 and anti-PIV5 P 161 (antibody cross-reacts with P of both  
178 viruses (24)), mouse monoclonal anti-HPIV3 NP (25). For quantitative immunoblots primary  
179 antibody-probed membranes were incubated with IRDye secondary antibodies (LiCOR) and signals  
180 detected using an Odyssey CLx scanner. Data were processed and analysed using Image Studio  
181 software (LiCOR).

## 182 **<sup>35</sup>S-methionine labelling.**

183 Subconfluent A549 and A549-ISG15<sup>-/-</sup> (B8) cells in 6-well plates were treated with 1000 IU/ml IFN- $\alpha$   
184 or left untreated. At 24 h, 48 h and 72 h following treatment cells were pulse-labelled with 500  
185 Ci/mmol <sup>35</sup>S-Methionine (<sup>35</sup>S-Met; MP Biomedical) in Met-free media (Sigma) for 1 h. Cells were  
186 washed in PBS, lysed in 2 x Laemmli sample buffer and equal amounts of protein were separated by  
187 SDS-PAGE. Gels were stained with Coomassie (and imaged to ensure equal loading), dried under  
188 vacuum, exposed to a storage phosphor screen and analysed by phosphorimager analysis.

189



## 190 **Results**

### 191 **ISG15-knockout A549 cells recapitulate ISG15-deficient patient cells**

192 Among the several immune modulatory roles of ISG15 (8), intracellular ISG15 expression, at least in  
193 human cells, is critical for regulating the magnitude of the type I IFN response (10, 14). To investigate  
194 the pleiotropic nature of human ISG15 we developed cell lines that lack ISG15 expression. Because of  
195 our interest in respiratory viruses, including paramyxoviruses, we chose to knockout ISG15  
196 expression in the lung adenocarcinoma cell line A549 by CRISPR/Cas9 genome editing as described  
197 previously (18). Furthermore, A549 cells have proved to be a very useful model for understanding  
198 virus-IFN interactions. The resulting culture was single cell cloned and ISG15 expression was  
199 assessed by immunoblotting three clones (B8, B6 and C4). We also selected a clone that had gone  
200 through the CRISPR/Cas9 process but retained ISG15 expression (C4+) (Fig. 1a). In addition to control  
201 A549 cells, all clones were treated with IFN- $\alpha$  for 24 h, 48 h or left untreated. Immunoblot analysis  
202 showed that, compared to control cells, expression of the ISGs MxA and IFIT1 were higher in A549-  
203 ISG15<sup>-/-</sup> cells (Fig. 1a). It was previously reported that increased ISG expression in ISG15-deficient  
204 cells was due to enhanced signalling resulting from the destabilisation of the type I IFN negative  
205 regulator USP18. To determine if IFN- $\alpha$  treatment led to enhanced signalling in A549-ISG15<sup>-/-</sup> cells we  
206 selected clone B8 for further analyses. Cells were treated with IFN- $\alpha$  for 30 min, extensively washed  
207 and media without IFN- $\alpha$  was replaced. Immunoblot analysis of cell lysates taken after 30 min  
208 treatment (and following washes; 0') and 30 min later (30') showed that IFN- $\alpha$  treatment led to the  
209 phosphorylation of STAT1, an indicator of IFN signalling, in both A549 and A549-ISG15<sup>-/-</sup> cells (Fig.  
210 1b). Following 24 h treatment, there was clear evidence of ISG expression as shown by the  
211 expression of MxA and ISG15 (in A549 cells) and enhanced expression of STAT1 (Fig. 1b). However,  
212 while phospho-STAT1 levels had abated in both cell lines 24 h post-IFN- $\alpha$  treatment, levels were  
213 clearly higher in A549-ISG15<sup>-/-</sup> cells indicating that in these cells there was a higher degree of  
214 signalling. We also tested the impact of ISG15-deficiency on the expression of various ISG mRNAs.

215 A549-ISG15<sup>-/-</sup> cells were, in addition to control A549 cells, treated with IFN- $\alpha$ , or left untreated, for  
216 24 h and the expression of various ISGs were examined by RT-qPCR. Whilst IFN- $\alpha$  treatment  
217 enhanced the expression of all ISGs tested, this increase was larger in ISG15-deficient cells compared  
218 to control A549 cells (between 5- and 10-fold, depending on the ISG) (Fig. 1c). Importantly, the  
219 expression of ISGs in non-stimulated cells was equivalent to control cells suggesting that ISG15-  
220 dependent regulation is specific to the IFN response and not required for the regulation of basal  
221 gene expression. Further experiments showed that lack of ISG15 prolonged the longevity of ISG  
222 protein expression, which presumably has an impact on patients with autoinflammatory diseases  
223 associated with ISG15 loss-of-function. Here, control A549 and knockout cells were treated with IFN-  
224  $\alpha$  for 24 h. The cells were washed and media (without IFN- $\alpha$ ) was then added. Cells were harvested  
225 every 24 h for 72 h and MxA expression was assessed by immunoblotting (Fig. 1d). In control A549  
226 cells MxA expression peaked at 24 h (the point at which IFN was removed) and had returned to basal  
227 levels between 48 and 72 h. In knockout cells MxA expression was clearly higher than in control cells,  
228 corroborating our mRNA analyses. Furthermore, while MxA expression in A549-ISG15<sup>-/-</sup> did recede  
229 between 48 and 72 h, high protein levels remained at 72 h (Fig. 1d). A dysregulated IFN response in  
230 ISG15-deficient cells is thought to be due to destabilisation of USP18, a known negative regulator of  
231 JAK/STAT signalling (10). To determine if USP18 is similarly affected in our cell lines, A549-ISG15<sup>-/-</sup>  
232 cells were treated with IFN- $\alpha$  for 24 or 48 h (or left untreated) and whole cell lysates were probed  
233 for USP18 by immunoblotting. USP18 was robustly induced in A549 cells following IFN- $\alpha$  treatment;  
234 however, levels of USP18 were much lower in IFN- $\alpha$ -treated ISG15-deficient cells (Fig. 1e). *USP18*  
235 mRNA levels were approximately 10-fold higher in IFN-treated ISG15-deficient cells compared to  
236 control A549s, demonstrating that reduced USP18 in A549-ISG15<sup>-/-</sup> cells was not due to reduced  
237 transcription (Fig. 1c). Together, these data show that ISG15 is critical for the regulated expression of  
238 ISGs. Moreover, they demonstrate that the effects of IFN treatment on our ISG15 knockout A549 cell  
239 lines recapitulate the findings in cells derived from ISG15-deficient, patient cells.

240

## 241 **ISG15-deficiency leads to translational repression following IFN treatment**

242 During our studies we observed that IFN- $\alpha$ -treatment of ISG15-knockout cells led to a reduction in  
243 protein synthesis and reasoned that this was a likely contributor to the reported virus resistance in  
244 ISG15-deficient cells (14). To investigate this we treated, or left untreated, A549 and A549-ISG15<sup>-/-</sup>  
245 (B8) cells with IFN- $\alpha$ . At 24 h, 48 h and 72 h following treatment cells were pulse labelled with <sup>35</sup>S-  
246 Methionine (<sup>35</sup>S-Met) for 1 h and the incorporation of <sup>35</sup>S-Met was analysed by phosphorimager  
247 analysis. These data showed, compared to control cells, that there was a pronounced decrease in  
248 protein synthesis in ISG15<sup>-/-</sup> cells between 24 h and 48 h (Fig. 2a). We also investigated whether this  
249 decrease in protein synthesis would lead to the inhibition of viral protein synthesis. Cells were pre-  
250 treated with IFN- $\alpha$  for 8 h, or left untreated, infected with the orthorubulavirus PIV5 (family  
251 *Paramyxoviridae*, sub-family *Orthorubulavirinae*) at a MOI of 10 and then labelled for 1 h with <sup>35</sup>S-  
252 Met at 24 h and 48 h p.i. (32 h and 56 h post IFN- $\alpha$  treatment, respectively). Because of the  
253 abundance of viral proteins in infected cells, they can be observed by phosphorimager analysis,  
254 which, following a 1 h treatment of infected cells with <sup>35</sup>S-Met at 24 and 48 h p.i., showed higher  
255 levels of newly synthesised viral protein at 24 h p.i. than at 48 h p.i. in A549 cells (Fig. 2b). This is  
256 because peak viral transcription occurs between 18 and 24 h p.i. (26). This differs from immunoblot  
257 analysis that measures the accumulation of viral protein over time; here, the levels of viral protein  
258 appeared as high, if not higher, at 48 h p.i. than 24 h p.i. (Fig. 2c). In contrast, the levels of viral  
259 protein synthesis following IFN- $\alpha$  treatment was higher at 48 h p.i. than at 24 h p.i. because IFN- $\alpha$   
260 treatment delayed PIV5 infection (Fig. 2b). This was also indicated by immunoblot analysis where the  
261 accumulation of NP was higher at 48 h p.i. than 24 h p.i. (Fig. 2c). When A549-ISG15<sup>-/-</sup> cells were  
262 infected, there was clear evidence of NP protein synthesis (Fig. 2b) and accumulation (Fig. 2c);  
263 however, when these cells were pre-treated with IFN- $\alpha$  and infected, there was very little evidence  
264 of viral protein synthesis (Fig. 2b) or accumulation (indicating that viral protein synthesis was barely  
265 initiated) (Fig. 2c) at any time p.i. These data demonstrate that IFN- $\alpha$ -treatment of A549-ISG15<sup>-/-</sup>

266 cells led to inhibition of protein synthesis that was associated with viral resistance, at least at later  
267 times.

268

269 **Pre-treatment of ISG15-deficient cells with IFN- $\alpha$  renders them resistant to parainfluenza virus**  
270 **infection**

271 Previous studies have shown that IFN- $\alpha$  treatment of ISG15-deficient patient cells renders them  
272 resistant to viral infection by several viruses, including the murine respirovirus (family  
273 *Paramyxoviridae*, sub-family *Orthoparamyxovirinae*) Sendai virus (14), and this seems to extend to  
274 PIV5 with our *in vitro* system (Fig. 2b-c). To investigate this in A549-ISG15<sup>-/-</sup> cells, control A549 cells  
275 and the ISG15 knockout clones described above were either untreated or treated with 1000 IU/ml  
276 IFN- $\alpha$ 2b (the same concentration and IFN- $\alpha$  type used in (14)) for 18 h. Cells were then infected with  
277 PIV5 (strain W3) (22) for 24 and 48 h and analysed by immunoblotting. In all cell lines, the levels of  
278 PIV5 nucleoprotein (NP) expression was equivalent at 24 and 48 h in unstimulated cells (Fig. 3a). In  
279 IFN- $\alpha$  pre-treated control cells, including C4+ that retained ISG15 expression, the level of NP  
280 expression was markedly reduced at 24 h. By 48 h, the level of NP increased showing that infection  
281 had progressed even in the presence of IFN- $\alpha$  (Fig. 3a). This is because the PIV5-V protein targets  
282 STAT1 for proteasomal degradation, and once sufficient V is expressed, the IFN response is  
283 dismantled allowing the virus to replicate (23). Indeed, there was no detectable STAT1, and as a  
284 result, markedly reduced levels of ISGs MxA and IFIT1 in PIV5-infected, ISG15-expressing cells (Fig.  
285 3a). However, all A549-ISG15<sup>-/-</sup> cell lines that had been pre-treated with IFN- $\alpha$  were resistant to PIV5  
286 infection as shown by dramatically reduced, or even absent, NP expression at both time points (Fig.  
287 3a). Moreover, these cells displayed STAT1 expression and the expression of associated MxA and  
288 IFIT1 (indicating that PIV5 infection was inhibited) (Fig. 3a).

289 Previous reports have shown that the ISG15 regulation of IFN signalling is independent of its ability  
290 to covalently modify proteins by ISGylation (10). To confirm this, we again applied CRISPR/Cas9

291 genome engineering technology and knocked out expression of UBA7, the E1 enzyme required for  
292 ISGylation. For this we took a different approach compared to generating our ISG15 knockout cells  
293 (19). Here, we introduced constitutive expression of Cas9 by lentiviral transduction of A549 cells and  
294 transduced A549-Cas9 cells with lentiGuide-Puro lentivirus carrying a guide RNA specific for UBA7,  
295 followed by single-cell cloning. We confirmed that all clones were UBA7-deficient by immunoblot  
296 analysis, which demonstrated that they retained expression of ISG15 but had lost the ability to  
297 ISGylate proteins (Fig. 3b). Additionally, following the scheme used in Fig. 3a, these cells were  
298 infected with PIV5-W3. These data showed that, compared to ISG15 knockout cells that were  
299 resistant to infection, all IFN- $\alpha$ -pre-treated UBA7-knockout cells were infected as efficiently as  
300 control cells (Fig. 3b), confirming reports that ISG15-dependent regulation of type I IFN signalling  
301 does not require ISGylation (10).

302

### 303 **The direct antiviral activity of ISGs is responsible for virus resistance**

304 Virus resistance can be induced following 8 h IFN- $\alpha$  treatment (shorter times were not tested), well  
305 before any obvious effect on global protein synthesis (Fig. 2). Therefore, shutdown of translation is  
306 unlikely to be the sole contributor to virus resistance at early time points and so we wished to  
307 determine whether the direct antiviral activity of ISGs was responsible. Addressing this question is  
308 complex since, for most viruses, the specific ISG(s) responsible for blocking replication is not known.  
309 However, for PIV5, it has been established that IFIT1 is the principle ISG responsible for most of the  
310 IFN-dependent antiviral activity (17, 27). We therefore hypothesised that if virus resistance was  
311 caused by the direct antiviral activity of ISGs, knockdown of IFIT1 in ISG15-deficient cells would  
312 permit PIV5 replication during an antiviral response. We reduced IFIT1 (according to (17)) in A549  
313 and A549-ISG15<sup>-/-</sup> cells and all four cell lines (A549, A549-ISG15<sup>-/-</sup> and the respective shIFIT1 cells)  
314 were pre-treated, or left untreated, with IFN- $\alpha$  and then infected with PIV5-W3 (MOI 10) for 24 and  
315 48 h. Expression of PIV5 NP, analysed by semi-quantitative immunoblotting, was used to measure

316 virus infection (Fig. 4a). IFIT1 levels and expression of ISG15 were likewise tested. Typically, pre-  
317 treatment of naïve cells with IFN- $\alpha$  reduced infection, as shown by a reduction in NP levels,  
318 compared to non-treated cells (Fig. 2b-c & 3a-b); nevertheless, because PIV5 expresses the IFN  
319 antagonist V protein, NP levels reach similar levels to untreated cells by 48 h p.i. However, this IFN-  
320 dependent reduction in virus infection is diminished when IFIT1 is knocked down, confirming earlier  
321 reports of IFIT1's antiviral activity against PIV5 (17, 27). While IFN- $\alpha$  pre-treatment of A549-ISG15<sup>-/-</sup>  
322 cells renders them resistant to infection, when IFIT1 was also knocked down, PIV5 infection was  
323 restored (Fig. 4a). Because we performed semi-quantitative immunoblotting of NP and  $\beta$ -Actin, we  
324 were able to quantify NP levels, allowing us to analyse these changes statistically (Fig. 4b). These  
325 data show that in IFN- $\alpha$ -pre-treated cells, knocking IFIT1 down restored NP to similar levels to those  
326 seen in untreated cells, regardless of ISG15 status. While IFN- $\alpha$  pre-treatment of A549 cells  
327 significantly reduced NP levels when we compared 24 h and 48 h p.i. samples, there was no  
328 difference at these time points when IFIT1 was knocked down (Fig. 4b). Importantly, while NP levels  
329 were virtually absent in IFN- $\alpha$ -pre-treated ISG15-deficient cells, when IFIT1 was knocked down in  
330 these cells NP levels were equivalent to A549-shIFIT1 cells (Fig. 4b).

331 Rather than solely relying on viral protein expression as a surrogate for virus infection, we also  
332 tested virus replication using biologically relevant plaque assays. Because paramyxoviruses (like  
333 most wild type viruses) are poor inducers of the IFN response (28, 29), are able to efficiently and  
334 rapidly counteract it if it were induced, and our data showed that basal ISG expression was not  
335 effected in ISG15-deficient cells (Fig. 1c), we predicted that infection of naïve A549-ISG15<sup>-/-</sup> cells  
336 would be equivalent to naïve A549 cells. To determine if this was the case, plaque assays were  
337 performed with various paramyxoviruses. These data show that each virus formed plaques that  
338 were analogous on both A549 and A549-ISG15<sup>-/-</sup> cells (Supplemental Fig. 1). There were subtle  
339 differences in plaque phenotype; for instance, infection of ISG15-deficient cells, particularly with  
340 HPIV2 but also evident following PIV5 infection, resulted in plaques with poorer defined edges (hazy  
341 plaques) (Supplemental Fig. 1). The reason for this is currently not clear but may indicate an antiviral

342 role for ISG15 against HPIV2 and PIV5. Nevertheless, this, and data in figures 2 and 3, supports the  
343 notion that naïve cells were not resistant to wild type viral infection. However, viruses unable to  
344 counteract the IFN response should be restricted and therefore provide a means of assessing the  
345 role of ISG15 and virus resistance.

346 To do this cells were infected with approximately 30-40 PFU of PIV5 strain CPI- (PIV5-CPI-) (30), a  
347 strain unable to block IFN signalling due to a mutation in its V protein. Infected cells were fixed 6 d  
348 p.i. and stained for viral antigen (Fig. 4c). As previously demonstrated (17), PIV5-CPI- was unable to  
349 efficiently form plaques in IFN-competent A549 cells. However, PIV5-CPI- did replicate when cells  
350 were unable to produce IFN, such as in A549-Npro cells that constitutively express bovine viral  
351 diarrhea virus (BVDV) Npro that cleaves IRF3 (a transcription factor critical for IFN induction (21)).  
352 Furthermore, when IFIT1 was knocked down, PIV5-CPI- was able to replicate (albeit less efficiently),  
353 further highlighting the major role of IFIT1 as an anti-PIV5 protein. As expected, and like A549 cells,  
354 there was very little virus replication in A549-ISG15<sup>-/-</sup> cells; however, when IFIT1 was knocked down,  
355 cells were able to support virus replication. It must be noted however that virus replication in A549-  
356 ISG15<sup>-/-</sup>/shIFIT1 cells did not recover to the same degree as A549-shIFIT1 cells. We propose that the  
357 reason for this will be complex and may include the likelihood that additional, yet to be identified,  
358 anti-PIV5 ISGs exist which are expressed at higher levels in ISG15-deficient cells. Another possible  
359 explanation is the inhibition of protein synthesis, including that of viral proteins, in ISG15-deficient  
360 cells; cells were infected for 6 days prior to performing the plaque assays, a time point beyond that  
361 required to observe a significant effect on protein synthesis (Fig. 2a). Therefore, the plaques  
362 observed in A549-ISG15<sup>-/-</sup>/shIFIT1 cells likely result from virus that replicated prior to the inhibition  
363 of global protein synthesis.

364 IFIT1 restricts viral infection post-transcriptionally by blocking the translation of viral mRNA (17, 27);  
365 therefore, we predicted that IFN- $\alpha$ -pre-treated A549-ISG15<sup>-/-</sup> cells would remain susceptible to  
366 infection, but that high levels of IFIT1 would mean these cells would not be permissive to PIV5

367 infection. Furthermore, investigating this could highlight additional restrictions to viral infection,  
368 such as entry. A549 and A549-ISG15<sup>-/-</sup> cells were pre-treated for 8 h with IFN- $\alpha$  and then infected  
369 with PIV5-W3 (MOI 10) (Fig. 4d). Analysis of PIV5 NP transcription showed that ISG15-deficient cells  
370 were infected and that viral transcription increased over time; however, this was muted compared  
371 to A549 control cells. Importantly however, the levels of NP transcription at 1 h p.i. was equivalent in  
372 both cell lines, a time point that likely represents primary transcription (Fig. 4d; see inset graph).  
373 These data suggest that both cell lines were susceptible to infection and that high levels of pre-  
374 existing IFIT1 strongly restricted further viral transcription by preventing the translation of the virally  
375 encoded mRNAs. To investigate if IFIT1 restriction was responsible for reduced viral transcription in  
376 ISG15-deficient cells, we repeated the experiment in A549-shIFIT1 and A549-ISG15<sup>-/-</sup>/shIFIT1 cells  
377 (Fig. 4e). These data show that in IFN- $\alpha$ -treated cells, viral transcription was markedly increased  
378 compared to cells with intact IFIT1 expression. Furthermore, in A549-shIFIT1 cells, transcription  
379 peaked between 12 and 18 h p.i. and then receded. We have recently described the transcription  
380 and replication of various paramyxoviruses, including PIV5-W3, using un-biased high throughput,  
381 RNA-seq approach (26); this report shows that this pattern of transcription is typical of PIV5-W3 and  
382 likely results from the phosphoprotein (P)-dependent repression of viral transcription and replication  
383 (31). This repression also occurred in A549-ISG15<sup>-/-</sup>/shIFIT1 cells, but this occurred later (Fig. 4e),  
384 suggesting that ISG15 may be an additional antiviral factor that curtail PIV5 transcription.  
385 Nevertheless, these data showed that when IFIT1 levels were knocked down, the transcriptional  
386 repression identified in IFN- $\alpha$ -pre-treated ISG15-deficient cells was relieved, demonstrating that  
387 virus resistance was due to the post-transcriptional activity of IFN-inducible IFIT1. We also  
388 investigated infection of these cell lines with other paramyxoviruses whose sensitivity to IFIT1 has  
389 been previously reported. Cells were treated with IFN- $\alpha$  and then infected with HPIV2 strain  
390 Colindale (MOI 10; family *Paramyxoviridae*, sub-family *Orthorubulavirinae*), which is reported to be  
391 moderately sensitive to IFIT1-restriction (27), for 24 and 48 h (untreated cells were not analysed  
392 because of high cytopathic effect in the absence of IFN). To investigate infection, we detected



393 expression of HPIV2 phosphoprotein (P) by semi-quantitative immunoblotting (Fig. 5a), which  
394 showed that IFN- $\alpha$ -pre-treated A549-ISG15<sup>-/-</sup> cells were largely resistant to infection, although by 48  
395 h p.i. there was some, albeit low level, evidence of viral protein accumulation. Nevertheless,  
396 infection of A549-ISG15<sup>-/-</sup>/shIFIT1 did allow significantly more viral protein expression. Semi-  
397 quantitative analyses demonstrated that viral protein accumulation in A549-ISG15<sup>-/-</sup>/shIFIT1 cells  
398 was significantly higher than in A549-ISG15<sup>-/-</sup> cells, but this was not as high as in A549 control cells,  
399 which agrees with the reported partial sensitivity of HPIV2 to IFIT1 restriction indicating that  
400 additional ISGs target HPIV2 (Fig. 5b). We performed a similar analysis with HPIV3 strain Washington  
401 (20) (family *Paramyxoviridae*, sub-family *Orthoparamyxovirinae*), a virus reported to have limited  
402 sensitivity to IFIT1 (27). Interestingly, pre-treatment of A549 and A549-shIFIT1 cells with IFN- $\alpha$  had  
403 less of an effect on virus protein accumulation compared to the effects on PIV5 infection (Fig. 5c).  
404 Furthermore, while infection of IFN- $\alpha$ -pre-treated ISG15 knockout cells significantly reduced  
405 infection compared to control cells, virus infection in these cells was still more robust compared to  
406 PIV5 and HPIV2-infected cells. Nevertheless, knockdown of IFIT1 only slightly increased HPIV3  
407 protein expression in both ISG15-competent and ISG15-deficient cells (Fig. 5d), supporting reports of  
408 a minor role of IFIT1 during the antiviral response to HPIV3 (27).

409

#### 410 **ISG15-deficient cells pre-treated with IFN- $\alpha$ for longer times were resistant to infection**

#### 411 **independently of the direct antiviral activity of IFN-dependent restriction factors**

412 Our data have so far suggested that early virus resistance is mediated by the direct antiviral activity  
413 of the IFN response. However, protein synthesis is reduced at later times post-IFN treatment and  
414 this is likely to cause resistance; therefore, we investigated whether PIV5 resistance could be  
415 induced independently of the direct antiviral activity of IFIT1. To do this we pre-treated the four cell  
416 lines (A549, A549-shIFIT1, A549-ISG15<sup>-/-</sup> and A549-ISG15<sup>-/-</sup>-shIFIT1) with IFN- $\alpha$  for different periods of  
417 time, infected with a recombinant PIV5 that expresses the fluorescent protein mCherry (rPIV5-

418 mCherry) for 48 h (MOI 10) and measured fluorescence as a marker of virus replication (Fig. 6a).  
419 Virus replication in A549 cells was equivalent regardless of the time cells had been pre-treated with  
420 IFN- $\alpha$  and, as expected, A549-ISG15<sup>-/-</sup> cells were resistant to infection at any time post IFN- $\alpha$   
421 treatment (Fig. 6b). Any advantage to PIV5 replication as a result of IFIT1 knockdown in A549-shIFIT1  
422 cells was lost when cells had been pre-treated for 16 h or more, as longer periods of pre-treatment  
423 resulted in replication equivalent to IFN-pre-treated A549 cells. Similarly, PIV5 replication in A549-  
424 ISG15<sup>-/-</sup>-shIFIT1 cells was higher than A549 control cells, and equivalent to A549-shIFIT1 cells,  
425 following 8 and 16 h pre-treatment; however, when cells were pre-treated for 24 h, replication was  
426 lower than in A549 and A549-shIFIT1 cells. Interestingly, as the time of pre-treatment of A549-ISG15<sup>-/-</sup>  
427 <sup>-/-</sup>-shIFIT1 cells extended, virus replication reduced further until cells became resistant (e.g. at 60 h  
428 and 72 h pre-treatment, Fig. 6b), which was not observed in A549 or A549-shIFIT1 cells. These data  
429 suggest that cell permissiveness progressively reduced with longer times of IFN- $\alpha$  pre-treatment,  
430 which correlated with the effects of IFN- $\alpha$  treatment on protein synthesis in ISG15-deficient cells  
431 (Fig. 2).

432 A previous report demonstrated that ISG15-dependent stabilisation of USP18 was required to bring  
433 about regulation of the type I IFN response and this was sufficient for these cells to once again be  
434 infected (14). However, what aspects of the antiviral response was responsible for resistance was  
435 not investigated. Taken together, these data strongly suggest that virus resistance in early IFN-  
436 treated ISG15-deficient cells was caused by the direct antiviral activity of ISGs and not due to a lack  
437 of permissiveness as a result of IFN-dependent inhibition of protein synthesis. Nevertheless, because  
438 of the reduced protein synthesis in IFN- $\alpha$ -treated ISG15-deficient cells, cells later become non-  
439 permissive to infection, even when key ISGs are eliminated.

440

441

## 442 Discussion

443 Previous work had shown that virus resistance was observed in cells that had been treated with IFN-  
444  $\alpha$  and then left to rest for 36 h prior to challenge (14). We had observed that IFN- $\alpha$  treatment of  
445 A549-ISG15<sup>-/-</sup> cells led to dramatic decreases in protein synthesis, particularly between 24 and 48 h;  
446 therefore, it was not clear whether the initially reported virus resistance was due to defects in  
447 translation (including of viral mRNAs) at the timepoint used in (14) or due to the direct antiviral  
448 activity of the IFN response. For most viruses, the specific ISG(s) with antiviral activity for a given  
449 virus is not known, making the latter difficult to discern; however, for PIV5, it is well established that  
450 IFIT1 is responsible for the majority of the antiviral response (17). To study this we generated A549-  
451 ISG15<sup>-/-</sup> cells and showed these cells recapitulated the effects observed in ISG15-deficient patient  
452 cells following treatment with IFN- $\alpha$  which included dysregulated ISG expression and reduced USP18  
453 protein levels following IFN- $\alpha$  treatment (Fig. 1). Additionally, by knocking-out UBA7, the first  
454 enzyme in the ISGylation cascade, we showed that ISGylation is not required for a regulated  
455 response (Fig. 3b), confirming previous reports that ‘free’ ISG15 is required for regulation (10).

456 Using these cell lines in combination with a PIV5 infection model, we showed that infection of IFN- $\alpha$ -  
457 pre-treated ISG15-deficient cells in which IFIT1 had been knocked down restored infection, thus  
458 confirming that at early times post infection, resistance was indeed due to the direct antiviral activity  
459 of the IFN response. Furthermore, because IFIT1 blocks the translation of viral transcripts, our data  
460 show that IFN-treated A549-ISG15<sup>-/-</sup> cells were still susceptible to infection, allowing viral  
461 transcription to take place prior to IFIT1 restriction, and that ISG15 was unlikely to significantly  
462 regulate processes involved in entry (Fig. 4d-e). Nevertheless, if ISG15-deficient cells were treated  
463 for longer periods with IFN- $\alpha$  prior to infection they did become resistant, even when IFIT1 was  
464 knocked down, suggesting that at later times the inhibition of protein synthesis was the principal  
465 cause of resistance (Fig. 6). These data suggest that the virus resistance reported by Speer et al. (14)

466 was due to a lack of permissiveness and not a result of the direct antiviral activity of the IFN  
467 response, although different cells were used in that study.

468 The data here demonstrate that the mechanism of resistance is likely two-fold, depending on the  
469 duration that cells are exposed to IFN- $\alpha$ . It is not currently possible to know which mechanism is  
470 dominant in ISG15-deficient patients, but it is likely to be a combination of both. Nevertheless, virus  
471 resistance results from a lack of IFN signalling control - as a consequence of ISG15-loss-of-function -  
472 which would explain why ISG15-deficient patients were not more susceptible to severe infection.  
473 This observation, therefore, cannot be used to support the notion that human ISG15 does not  
474 possess direct antiviral activity, as proposed (14, 16). It is likely that many viruses will not be  
475 sensitive to ISG15-dependent antiviral activity; however, this is true of many antiviral effectors. For  
476 example, and as confirmed in this study, IFIT1 strongly restricts PIV5 infection, yet it has reduced  
477 activity against HPIV2 and likely no activity against HPIV3 or human respiratory syncytial virus (27). It  
478 is also true that several ISGs are often required to limit infection (6); therefore, if one antiviral  
479 effector mechanism is absent (such as ISGylation), there is sufficient redundancy to avoid severe  
480 effects of infection (redundancy that can complicate the investigation of specific antiviral  
481 mechanisms in *in vitro* studies). Nevertheless, several human viruses have been shown to be  
482 sensitive to ISGylation and many have evolved specific mechanisms to counteract antiviral  
483 ISGylation, adding further weight to the argument that human ISG15 does have antiviral activity  
484 (reviewed in (8)). Indeed, other than the handful of patients that have been found to lack ISG15  
485 expression (10, 32), individuals will possess an intact IFN response where the antiviral activity of  
486 ISG15 (and other effectors) will function, if the infecting virus is sensitive to it.

487 It was surprising that protein synthesis was so affected in ISG15-deficient cells following IFN  
488 treatment. It is well established that inhibition of general protein translation is a key feature of the  
489 antiviral response and this is through the actions of proteins such as PKR or PERK (PKR-like ER kinase)  
490 (4). However, for PKR to be activated it must recognise dsRNA, which was absent in IFN- $\alpha$ -treated

491 cells. Similarly, PERK is activated upon endoplasmic reticulum stress which might be expected during  
492 a viral infection, but not following treatment with IFN alone. Previous reports have shown that  
493 carcinoembryonic antigen-related cell adhesion molecule 1 (CEACAM1) has antiviral activity against  
494 human cytomegalovirus, influenza virus and metapneumovirus by suppressing mTOR-mediated  
495 protein synthesis (33, 34). The membrane protein CEACAM1 is induced by innate sensors such as  
496 TLR-4 (35) and IFI16 (34) and delivers inhibitory signals via SHP1 (haematopoietic cells) or SHP2  
497 (epithelial and endothelial cells) phosphatase activity through CEACAM1 immunoreceptor tyrosine-  
498 based inhibitory motifs (ITIMs) (36). CEACAM1 expression is rapidly induced following activation of  
499 NF- $\kappa$ B and IRF1, but whether IFN- $\alpha$  alone (as used here) can induce its expression is not clear. The  
500 *IRF1* promoter possesses a single GAS element, but no ISRE, and so its expression is induced by  
501 STAT1 homodimers (37). Type I IFN signalling predominantly leads to the formation of STAT1-STAT2  
502 heterodimers that associate with IRF9 (to form the ISGF3 transcription factor) to drive expression of  
503 ISGs that possess ISRE elements in their promoters; however, STAT1 homodimers are formed after  
504 type I IFN treatment, but these are at lower concentrations. It is possible that 'late' inhibition of  
505 protein synthesis in ISG15-deficient cells (compared to the swifter antiviral activity of ISRE-  
506 containing genes such as IFIT1) may relate to the kinetics of CEACAM1 expression as the  
507 accumulation of STAT1 homodimers is required to drive the expression of *IRF1*, that itself needs to  
508 be translated before it induces *CEACAM1*. Of course, the accumulation of STAT1 homodimers may  
509 be higher in ISG15-deficient cells because of a dysregulated type I IFN response. Nevertheless, it is  
510 plausible that the overamplified type I IFN response in ISG15-deficient cells led to high levels of  
511 CEACAM1 (compared to control cells) resulting in inhibition of protein synthesis. Moreover, ISG15  
512 may have yet-to-be characterised functions in regulating the cellular response to stressors that lead  
513 to inhibition of protein synthesis.

514 It has been reported that ISG15 has a role in regulating the cell cycle through its interactions with  
515 SKP2 and USP18, although experiments in that study were not performed in IFN-treated cells, nor  
516 were ISG15 knockout cells tested (15). While rates of protein synthesis differ during different stages

517 of the cell cycle, translation is thought to be lowest during mitosis (38). Perturbation of the ISG15-  
518 SKP2-USP18 axis following ablation of USP18 led to a delayed progression from G1 to S phase which  
519 is not generally thought to be associated with translational repression (39). Of note, we have not  
520 observed any obvious differences in cell growth in non-treated A549-ISG15<sup>-/-</sup> cells. Further work is  
521 required to dissect the mechanism responsible for ISG15's effects on general protein translation  
522 during an antiviral response.

523 ISG15 has emerged as a central regulator of immunity. It is a pleotropic protein that is strongly  
524 expressed following activation of innate immune sensors and connects innate and adaptive  
525 immunity. In this study, we have shown that a lack of ISG15 leads to virus resistance by two  
526 kinetically distinct mechanisms; the rapid induction of antiviral ISGs and the unexpected effects on  
527 protein synthesis. Our newly developed cell lines and infection model will pave the way for further  
528 studies investigating the regulatory mechanisms of ISG15 during the antiviral response.

529

### 530 **Acknowledgments**

531 We are grateful to ERASMUS+ for supporting DH. The authors also acknowledge technical support  
532 provided by Christopher Simmons-Riach and Miroslav Botev.

533 **References**

- 534 1. McFadden, M.J., N.S. Gokhale, and S.M. Horner. 2017. Protect this house: cytosolic sensing  
535 of viruses. *Curr Opin Virol.* 22: 36-43.
- 536 2. Kawai, T. and S. Akira. 2010. The role of pattern-recognition receptors in innate immunity:  
537 update on Toll-like receptors. *Nat Immunol.* 11(5): 373-384.
- 538 3. Randall, R.E. and S. Goodbourn. 2008. Interferons and viruses: an interplay between  
539 induction, signalling, antiviral responses and virus countermeasures. *J Gen Virol.* 89(Pt 1): 1-  
540 47.
- 541 4. Dalet, A., E. Gatti, and P. Pierre. 2015. Integration of PKR-dependent translation inhibition  
542 with innate immunity is required for a coordinated anti-viral response. *FEBS Lett.* 589(14):  
543 1539-1545.
- 544 5. Mears, H.V. and T.R. Sweeney. 2018. Better together: the role of IFIT protein-protein  
545 interactions in the antiviral response. *J Gen Virol.* 99(11): 1463-1477.
- 546 6. Schoggins, J.W., S.J. Wilson, M. Panis, M.Y. Murphy, C.T. Jones, P. Bieniasz, and C.M. Rice.  
547 2011. A diverse range of gene products are effectors of the type I interferon antiviral  
548 response. *Nature.* 472(7344): 481-485.
- 549 7. Yu, Z.X. and H.M. Song. 2019. Toward a better understanding of type I interferonopathies: a  
550 brief summary, update and beyond. *World J Pediatr.*
- 551 8. Perng, Y.C. and D.J. Lenschow. 2018. ISG15 in antiviral immunity and beyond. *Nat Rev*  
552 *Microbiol.* 16(7): 423-439.
- 553 9. Malakhov, M.P., O.A. Malakhova, K.I. Kim, K.J. Ritchie, and D.E. Zhang. 2002. UBP43 (USP18)  
554 specifically removes ISG15 from conjugated proteins. *J Biol Chem.* 277(12): 9976-9981.
- 555 10. Zhang, X., D. Bogunovic, B. Payelle-Brogard, V. Francois-Newton, S.D. Speer, C. Yuan, S.  
556 Volpi, Z. Li, O. Sanal, D. Mansouri, I. Tezcan, G.I. Rice, C. Chen, N. Mansouri, S.A. Mahdavian,  
557 Y. Itan, B. Boisson, S. Okada, L. Zeng, X. Wang, H. Jiang, W. Liu, T. Han, D. Liu, T. Ma, B. Wang,  
558 M. Liu, J.Y. Liu, Q.K. Wang, D. Yalnizoglu, L. Radoshevich, G. Uze, P. Gros, F. Rozenberg, S.Y.  
559 Zhang, E. Jouanguy, J. Bustamante, A. Garcia-Sastre, L. Abel, P. Lebon, L.D. Notarangelo, Y.J.  
560 Crow, S. Boisson-Dupuis, J.L. Casanova, and S. Pellegrini. 2015. Human intracellular ISG15  
561 prevents interferon-alpha/beta over-amplification and auto-inflammation. *Nature.*  
562 517(7532): 89-93.
- 563 11. Francois-Newton, V., G. Magno de Freitas Almeida, B. Payelle-Brogard, D. Monneron, L.  
564 Pichard-Garcia, J. Piehler, S. Pellegrini, and G. Uze. 2011. USP18-based negative feedback  
565 control is induced by type I and type III interferons and specifically inactivates interferon  
566 alpha response. *PLoS One.* 6(7): e22200.
- 567 12. Malakhova, O.A., K.I. Kim, J.K. Luo, W. Zou, K.G. Kumar, S.Y. Fuchs, K. Shuai, and D.E. Zhang.  
568 2006. UBP43 is a novel regulator of interferon signaling independent of its ISG15  
569 isopeptidase activity. *EMBO J.* 25(11): 2358-2367.
- 570 13. Sarasin-Filipowicz, M., X. Wang, M. Yan, F.H. Duong, V. Poli, D.J. Hilton, D.E. Zhang, and M.H.  
571 Heim. 2009. Alpha interferon induces long-lasting refractoriness of JAK-STAT signaling in the  
572 mouse liver through induction of USP18/UBP43. *Mol Cell Biol.* 29(17): 4841-4851.
- 573 14. Speer, S.D., Z. Li, S. Buta, B. Payelle-Brogard, L. Qian, F. Vigant, E. Rubino, T.J. Gardner, T.  
574 Wedeking, M. Hermann, J. Duehr, O. Sanal, I. Tezcan, N. Mansouri, P. Tabarsi, D. Mansouri,  
575 V. Francois-Newton, C.F. Daussy, M.R. Rodriguez, D.J. Lenschow, A.N. Freiberg, D. Tortorella,  
576 J. Piehler, B. Lee, A. Garcia-Sastre, S. Pellegrini, and D. Bogunovic. 2016. ISG15 deficiency and  
577 increased viral resistance in humans but not mice. *Nat Commun.* 7: 11496.
- 578 15. Vuillier, F., Z. Li, P.H. Commere, L.T. Dynesen, and S. Pellegrini. 2019. USP18 and ISG15  
579 coordinately impact on SKP2 and cell cycle progression. *Sci Rep.* 9(1): 4066.
- 580 16. Hermann, M. and D. Bogunovic. 2017. ISG15: In Sickness and in Health. *Trends Immunol.*  
581 38(2): 79-93.



- 582 17. Andrejeva, J., H. Norsted, M. Habjan, V. Thiel, S. Goodbourn, and R.E. Randall. 2013.  
583 ISG56/IFIT1 is primarily responsible for interferon-induced changes to patterns of  
584 parainfluenza virus type 5 transcription and protein synthesis. *J Gen Virol.* 94(Pt 1): 59-68.
- 585 18. Domingues, P., C.G. Bamford, C. Boutell, and J. McLauchlan. 2015. Inhibition of hepatitis C  
586 virus RNA replication by ISG15 does not require its conjugation to protein substrates by the  
587 HERC5 E3 ligase. *J Gen Virol.* 96(11): 3236-3242.
- 588 19. Sanjana, N.E., O. Shalem, and F. Zhang. 2014. Improved vectors and genome-wide libraries  
589 for CRISPR screening. *Nat Methods.* 11(8): 783-784.
- 590 20. Durbin, A.P., J.M. McAuliffe, P.L. Collins, and B.R. Murphy. 1999. Mutations in the C, D, and V  
591 open reading frames of human parainfluenza virus type 3 attenuate replication in rodents  
592 and primates. *Virology.* 261(2): 319-330.
- 593 21. Hilton, L., K. Moganeradj, G. Zhang, Y.H. Chen, R.E. Randall, J.W. McCauley, and S.  
594 Goodbourn. 2006. The NPro product of bovine viral diarrhoea virus inhibits DNA binding by  
595 interferon regulatory factor 3 and targets it for proteasomal degradation. *J Virol.* 80(23):  
596 11723-11732.
- 597 22. Choppin, P.W. 1964. Multiplication of a Myxovirus (Sv5) with Minimal Cytopathic Effects and  
598 without Interference. *Virology.* 23: 224-233.
- 599 23. Didcock, L., D.F. Young, S. Goodbourn, and R.E. Randall. 1999. The V protein of simian virus 5  
600 inhibits interferon signalling by targeting STAT1 for proteasome-mediated degradation. *J*  
601 *Virol.* 73(12): 9928-9933.
- 602 24. Randall, R.E., D.F. Young, K.K. Goswami, and W.C. Russell. 1987. Isolation and  
603 characterization of monoclonal antibodies to simian virus 5 and their use in revealing  
604 antigenic differences between human, canine and simian isolates. *J Gen Virol.* 68 ( Pt 11):  
605 2769-2780.
- 606 25. Rydbeck, R., C. Orvell, A. Love, and E. Norrby. 1986. Characterization of four parainfluenza  
607 virus type 3 proteins by use of monoclonal antibodies. *J Gen Virol.* 67 ( Pt 8): 1531-1542.
- 608 26. Wignall-Fleming, E.B., D.J. Hughes, S. Vattipally, S. Modha, S. Goodbourn, A.J. Davison, and  
609 R.E. Randall. 2019. Analysis of Paramyxovirus Transcription and Replication by High-  
610 Throughput Sequencing. *J Virol.* 93(17).
- 611 27. Young, D.F., J. Andrejeva, X. Li, F. Inesta-Vaquera, C. Dong, V.H. Cowling, S. Goodbourn, and  
612 R.E. Randall. 2016. Human IFIT1 Inhibits mRNA Translation of Rubulaviruses but Not Other  
613 Members of the Paramyxoviridae Family. *J Virol.* 90(20): 9446-9456.
- 614 28. Killip, M.J., D.F. Young, C.S. Ross, S. Chen, S. Goodbourn, and R.E. Randall. 2011. Failure to  
615 activate the IFN-beta promoter by a paramyxovirus lacking an interferon antagonist.  
616 *Virology.* 415(1): 39-46.
- 617 29. Killip, M.J., D.F. Young, D. Gatherer, C.S. Ross, J.A. Short, A.J. Davison, S. Goodbourn, and R.E.  
618 Randall. 2013. Deep sequencing analysis of defective genomes of parainfluenza virus 5 and  
619 their role in interferon induction. *J Virol.* 87(9): 4798-4807.
- 620 30. Chen, C., R.W. Compans, and P.W. Choppin. 1971. Parainfluenza virus surface projections:  
621 glycoproteins with haemagglutinin and neuraminidase activities. *J Gen Virol.* 11(1): 53-58.
- 622 31. Young, D.F., E.B. Wignall-Fleming, D.C. Busse, M.J. Pickin, J. Hankinson, E.M. Randall, A.  
623 Tavendale, A.J. Davison, D. Lamont, J.S. Tregoning, S. Goodbourn, and R.E. Randall. 2019.  
624 The switch between acute and persistent paramyxovirus infection caused by single amino  
625 acid substitutions in the RNA polymerase P subunit. *PLoS Pathog.* 15(2): e1007561.
- 626 32. Bogunovic, D., M. Byun, L.A. Durfee, A. Abhyankar, O. Sanal, D. Mansouri, S. Salem, I.  
627 Radovanovic, A.V. Grant, P. Adimi, N. Mansouri, S. Okada, V.L. Bryant, X.F. Kong, A. Kreins,  
628 M.M. Velez, B. Boisson, S. Khalilzadeh, U. Ozcelik, I.A. Darazam, J.W. Schoggins, C.M. Rice, S.  
629 Al-Muhsen, M. Behr, G. Vogt, A. Puel, J. Bustamante, P. Gros, J.M. Huibregtse, L. Abel, S.  
630 Boisson-Dupuis, and J.L. Casanova. 2012. Mycobacterial disease and impaired IFN-gamma  
631 immunity in humans with inherited ISG15 deficiency. *Science.* 337(6102): 1684-1688.



- 632 33. Diab, M., A. Vitenshtein, Y. Drori, R. Yamin, O. Danziger, R. Zamostiano, M. Mandelboim, E.  
633 Bacharach, and O. Mandelboim. 2016. Suppression of human metapneumovirus (HMPV)  
634 infection by the innate sensing gene CEACAM1. *Oncotarget*. 7(41): 66468-66479.
- 635 34. Vitenshtein, A., Y. Weisblum, S. Hauka, A. Halenius, E. Oiknine-Djian, P. Tsukerman, Y.  
636 Bauman, Y. Bar-On, N. Stern-Ginossar, J. Enk, R. Ortenberg, J. Tai, G. Markel, R.S. Blumberg,  
637 H. Hengel, S. Jonjic, D.G. Wolf, H. Adler, R. Kammerer, and O. Mandelboim. 2016. CEACAM1-  
638 Mediated Inhibition of Virus Production. *Cell Rep*. 15(11): 2331-2339.
- 639 35. Muenzner, P., M. Naumann, T.F. Meyer, and S.D. Gray-Owen. 2001. Pathogenic *Neisseria*  
640 trigger expression of their carcinoembryonic antigen-related cellular adhesion molecule 1  
641 (CEACAM1; previously CD66a) receptor on primary endothelial cells by activating the  
642 immediate early response transcription factor, nuclear factor-kappaB. *J Biol Chem*. 276(26):  
643 24331-24340.
- 644 36. Gray-Owen, S.D. and R.S. Blumberg. 2006. CEACAM1: contact-dependent control of  
645 immunity. *Nat Rev Immunol*. 6(6): 433-446.
- 646 37. Michalska, A., K. Blaszczyk, J. Wesoly, and H.A.R. Bluysen. 2018. A Positive Feedback  
647 Amplifier Circuit That Regulates Interferon (IFN)-Stimulated Gene Expression and Controls  
648 Type I and Type II IFN Responses. *Front Immunol*. 9: 1135.
- 649 38. Polymenis, M. and R. Aramayo. 2015. Translate to divide: small es, Cyrillicontrol of the cell  
650 cycle by protein synthesis. *Microb Cell*. 2(4): 94-104.
- 651 39. Stumpf, C.R., M.V. Moreno, A.B. Olshen, B.S. Taylor, and D. Ruggero. 2013. The translational  
652 landscape of the mammalian cell cycle. *Mol Cell*. 52(4): 574-582.

653

654

655 **Figure Legends**

656 **Fig. 1.** Functional characterisation of A549-ISG15 knockout cell lines. (a) CRSIPR/Cas9 genome editing  
657 was used to knockout ISG15 expression in A549 cells followed by single-cell cloning (following  
658 previously reported procedures (18)). Four independent clones were treated with 1000 IU/ml IFN- $\alpha$   
659 for 24 and 48 h, or left untreated, and protein expression was tested by immunoblot analysis of  
660 ISG15, MxA, IFIT1 and  $\beta$ -Actin. 'Control' cells were naïve A549 cells. Representative image from two  
661 independent experiments. (b) A549 and A549-ISG15<sup>-/-</sup> (B8) cells were treated with 1000 IU/ml IFN- $\alpha$   
662 for 30 min then extensively washed and media without IFN replaced. Cells were harvested at 0 min  
663 (0'), 30 min (30') and 24 h after IFN- $\alpha$  removal and phospho-STAT1, total STAT1, MxA, ISG15 and  $\beta$ -  
664 Actin were detected following immunoblot analysis. (c) A549 and A549-ISG15<sup>-/-</sup> (clone B8) were  
665 treated with 1000 IU/ml IFN- $\alpha$  for 24 h. Expression of interferon stimulated genes was tested using  
666 RT-qPCR with primers specific for *HERC5*, *USP18*, *IFIT1* and *MxA*. Relative expression was determined  
667 following SYBR green qPCR using  $\Delta\Delta$ Ct method.  $\beta$ -Actin expression was used to normalise between  
668 samples. Error bars represent the standard deviation of the mean from three independent RNA  
669 samples. (d) A549 and A549-ISG15<sup>-/-</sup> (clone B8) were treated with 1000 IU/ml for 24 h. Cells were  
670 washed and fresh media (without IFN- $\alpha$ ) was replaced. Cells were processed for immunoblot  
671 analysis using antibodies specific for MxA and  $\beta$ -Actin at 24 h post IFN- $\alpha$  and every 24 h thereafter  
672 for 72 h. Controls were cells without IFN- $\alpha$ . Representative image from two independent  
673 experiments. (e) A549 and A549-ISG15<sup>-/-</sup> (clone B8) were treated with 1000 IU/ml for 24 h and 48 h  
674 (or left untreated). Whole cell lysates were analysed by immunoblotting with antibodies specific for  
675 USP18, ISG15 and  $\beta$ -Actin. Image is representative of >3 independent experiments.

676

677 **Fig. 2.** Analysis of cellular and viral protein synthesis in ISG15-deficient cells during an antiviral state.  
678 (a) Sub-confluent A549 and A549-ISG15<sup>-/-</sup> (B8) cells were treated with 1000 IU/ml IFN- $\alpha$  or left  
679 untreated. At 24 h, 48 h and 72 h cells were pulsed for 1 h with L-[<sup>35</sup>S]-Methionine (<sup>35</sup>S-Met) in Met-

680 free media to metabolically label nascent proteins. Proteins were resolved by SDS-PAGE and stained  
681 with Coomassie to ensure equal loading. Labelled proteins were visualised by phosphorimager  
682 analysis. (b) A549 and A549-ISG15<sup>-/-</sup> (B8) cells were treated with 1000 IU/ml IFN- $\alpha$  for 8 h or left  
683 untreated and then infected with PIV5 strain W3 (MOI = 10). At 24 or 48 h post infection cells pulsed  
684 and processed as in (a). Arrow heads denote <sup>35</sup>S-Met-labelled PIV5 nucleoprotein (NP). Both  
685 experiments were performed independently at least twice. (c) PIV5-infected lysates from (b) were  
686 immunoblotted and the accumulation of PIV5 NP and  $\beta$ -Actin were detected with specific antibodies  
687 and HRP-conjugated secondary antibodies.

688

689 **Fig. 3.** IFN- $\alpha$  pre-treatment of ISG15-deficient cells leads to virus resistance which is independent of  
690 ISGylation. (a) Control (naïve A549) and 4 independent clones of A549-ISG15<sup>-/-</sup> cells generated by  
691 CRISPR/Cas9 genome editing were treated with 1000 IU/ml IFN- $\alpha$  for 16 h or left untreated and then  
692 infected with PIV5 strain W3 (MOI = 10). Cells were harvested at 24 h and 48 h p.i. and processed for  
693 immunoblot analysis using antibodies specific for PIV5 nucleoprotein (NP), ISG15, STAT1, IFIT1, MxA  
694 and  $\beta$ -Actin. This experiment was independently performed twice. (b) UBA7 knockout cells were  
695 generated using CRISPR/Cas9 genome editing; Cas9-expressing A549 cells were first generated  
696 (following transduction with lentiCas9-Blast) and then transduced with lentiGuide-Puro expressing a  
697 single guide RNA that targeted exon 3 of the UBA7 gene. Knockout cells were single cell cloned and  
698 three were selected for further analysis. These cells were treated with IFN- $\alpha$  or left untreated,  
699 infected and processed as in (a) using antibodies specific for PIV5 NP, ISG15, UBA7 and  $\beta$ -Actin. This  
700 experiment was independently performed twice.

701

702 **Fig. 4.** Direct antiviral activity of ISGs is responsible for virus resistance due to ISG15-loss-of-function.  
703 (a) IFIT1 was constitutively knocked down in A549 or A549-ISG15<sup>-/-</sup> (B8) cells following a previously  
704 described method (17). A549, A549-ISG15<sup>-/-</sup> (B8) and the corresponding IFIT1 knockdown cells were

705 treated with IFN- $\alpha$ , infected with PIV5 and processed as in Fig. 3a. Following immunoblotting with  
706 specific antibodies, PIV5 NP and  $\beta$ -Actin were detected using near-infrared (NIR) dye-conjugated  
707 secondary antibodies to facilitate quantification. IFIT1 and ISG15 proteins were detected using  
708 chemiluminescence following incubation with horseradish peroxidase (HRP)-conjugated secondary  
709 antibodies. (b) Experiments described in (a) were performed independently three times (infections  
710 were performed on three separate occasions) and NP and  $\beta$ -Actin levels were quantified using Image  
711 Studio software (LiCOR). Signals were relative to those generated from IFN- $\alpha$ -treated A549 cells  
712 infected for 48 h p.i. (set to 100%). Error bars represent the standard deviation of the mean from the  
713 three independent experiments performed on different occasions. Asterisks denote statistical  
714 significance using two-way ANOVA and Tukey's multiple comparisons test: \* ( $P < 0.05$ ), n.s. denotes  
715 no statistical significance. (c) Indicated cells were infected for 1 h with 30 – 40 plaque forming units  
716 (PFU) of PIV5 (CPI-), a strain unable to block the IFN response due to mutation in the viral V protein.  
717 Monolayers were fixed 6 d p.i. Plaques were detected using a pool of anti-PIV5 antibodies specific  
718 for hemagglutinin (HN), nucleoprotein (NP), phosphoprotein (P) and matrix protein (M) (see (24)).  
719 Plaque assays were performed on 3 independent occasions. (d) A549 and A549-ISG15<sup>-/-</sup> cells were  
720 infected with PIV5 W3 (MOI 10) and harvested at the indicated times. Total RNA was isolated and  
721 subjected to cDNA synthesis using oligo(dT) primers. Expression of PIV5 NP was measured using  
722 qPCR. Relative expression (compared to 1 h A549) was determined following SYBR green qPCR using  
723  $\Delta\Delta C_t$  method.  $\beta$ -Actin expression was used to normalise between samples. Error bars represent the  
724 standard deviation of the mean from three independent RNA samples. For clarity, the inset bar  
725 graph represents viral transcription data at 1 h and 6 h p.i. only. (e) Analyses followed that of (d) but  
726 A549-shIFIT1 and A549-ISG15<sup>-/-</sup>/shIFIT1 cells were infected.

727

728 **Fig. 5.** Restoration of paramyxovirus infection in IFN- $\alpha$ -pretreated ISG15<sup>-/-</sup> cells reflects their  
729 reported sensitivity to IFIT1. (a-b) Experiments were performed as in (Fig. 4a-b). (a) HPIV2 proteins

730 were detected with antibodies specific for HPIV2 P (clone 161; (24)) and NIR-conjugated secondary  
731 antibodies. Asterisks denotes detection of an irrelevant protein, arrow denotes HPIV2 P. Samples not  
732 treated with IFN- $\alpha$  were omitted due to the highly lytic nature of HPIV2 which hampered their  
733 accurate quantification. (b) Quantification of normalised NP signals and compared to the 48 h p.i.  
734 sample that was set to 100%. (c) HPIV3 NP proteins were detected using antibodies specific for  
735 HPIV3 NP and NIR-conjugated secondary antibodies. (d) Normalised signals were quantified as in (b)  
736 and compared to IFN- $\alpha$ -treated, 48 h p.i. samples (set to 100%). Means and standard deviations  
737 were derived from 5 independent experiments for HPIV2 and 4 independent experiments (for  
738 HPIV3) performed on different occasions. Asterisks denote statistical significance using two-way  
739 ANOVA with Tuckey's multiple comparison test (for HPIV3) and one-way ANOVA with Sidak's  
740 multiple comparisons test (for HPIV2): \*\* (P < 0.01), \*\*\* (P < 0.001), n.s. denotes no statistical  
741 significance.

742

743 **Fig. 6.** Virus resistance is induced in ISG15-deficient cells following longer periods of IFN- $\alpha$  pre-  
744 treatment. (a) Experimental workflow. (b) Cells were treated 1000 IU/ml IFN- $\alpha$  in 6-well plates for  
745 the indicated times prior to infection. Pre-treated cells were infected with rPIV5-mCherry (MOI 10)  
746 for 48 h and mCherry fluorescence was measured using an IncuCyte ZOOM. Background  
747 fluorescence from mock-infected wells was subtracted. Data are representative to two independent  
748 experiments.

749

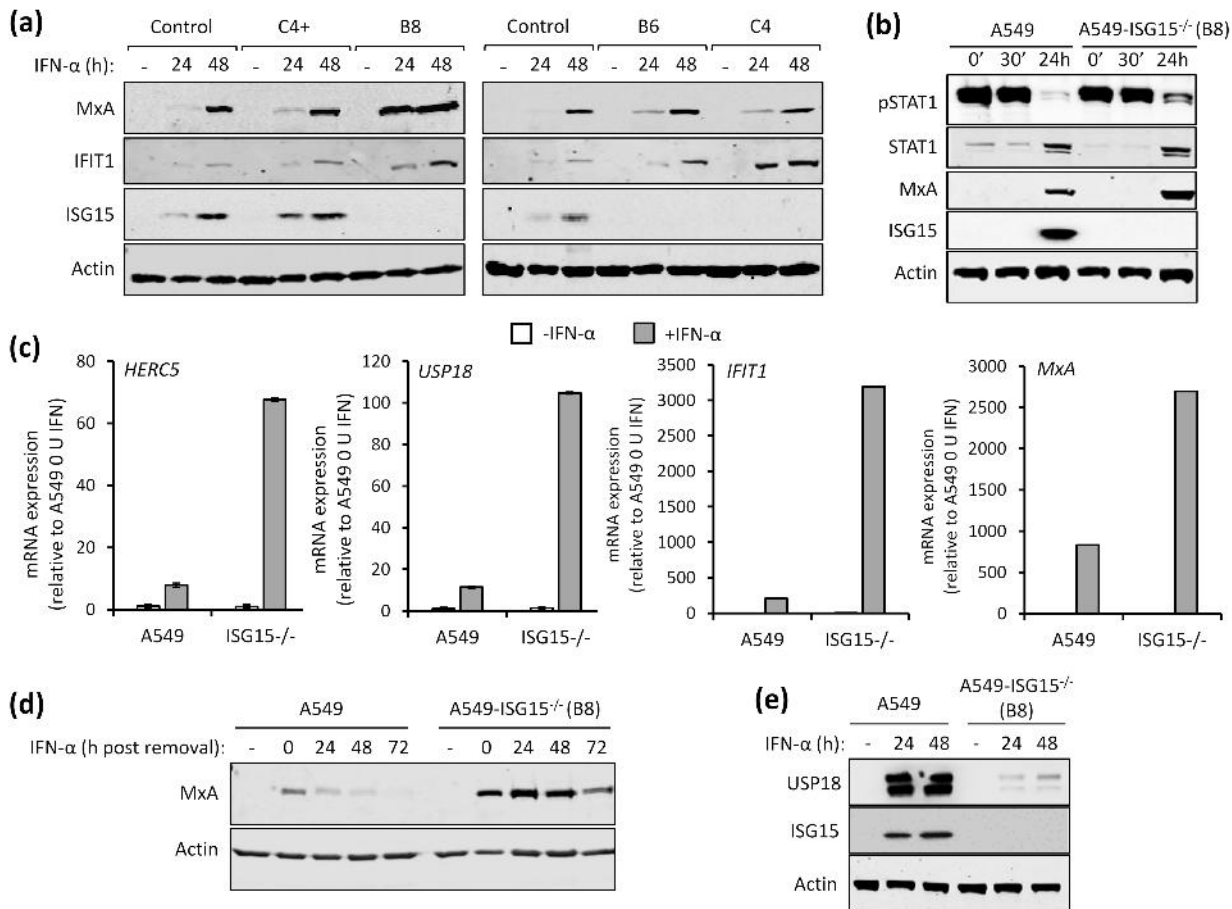

**(a)**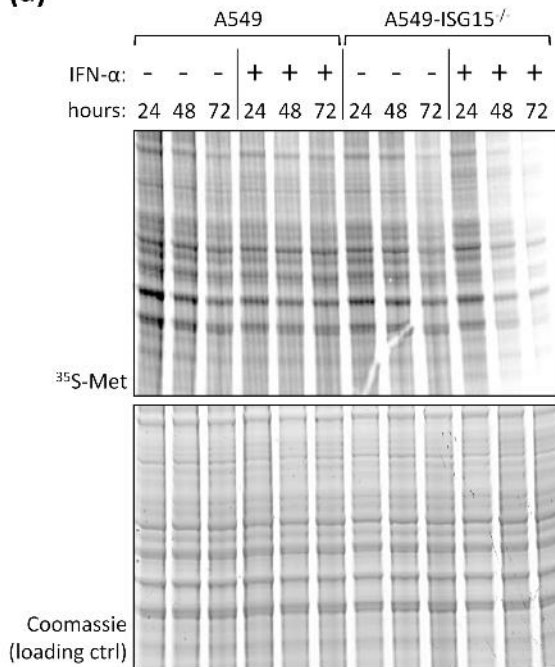**(b)**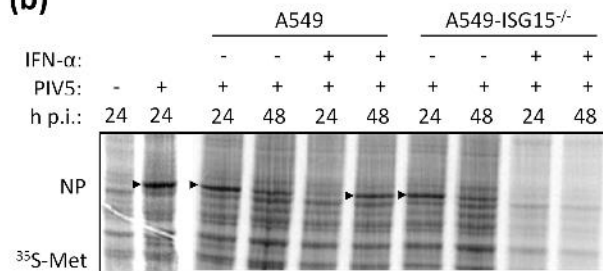**(c)**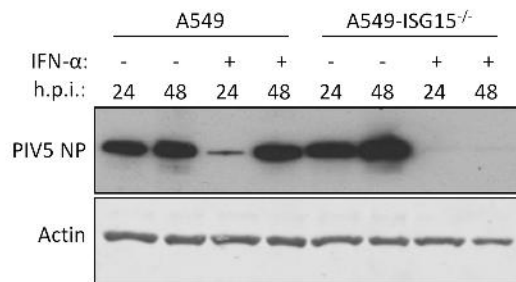

**(a)**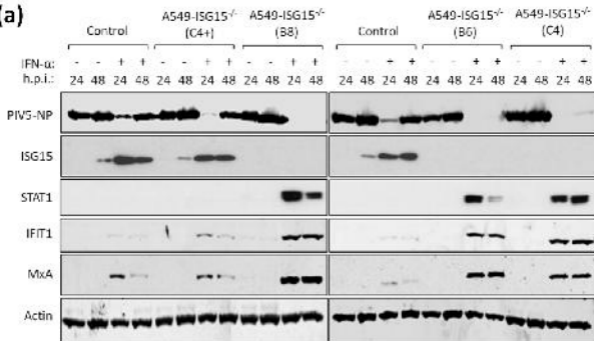**(b)**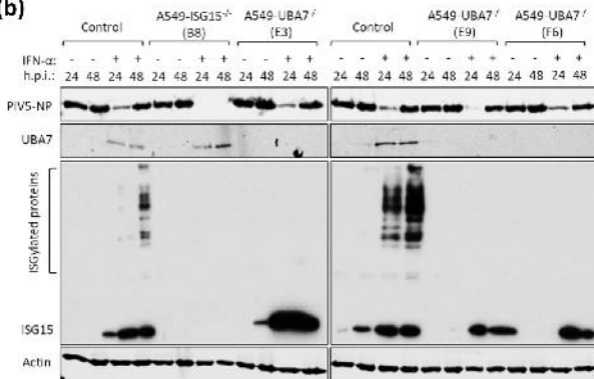



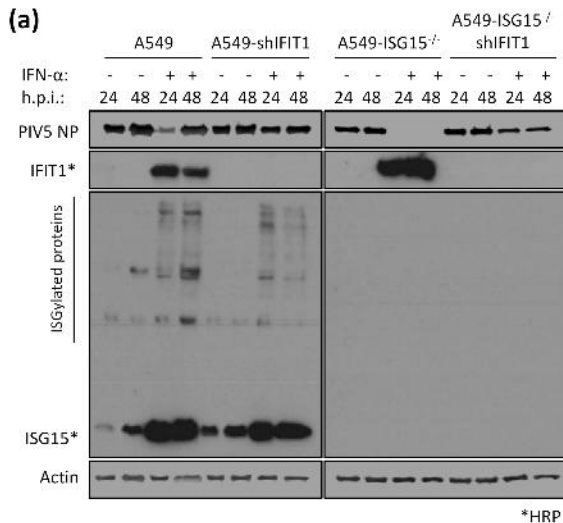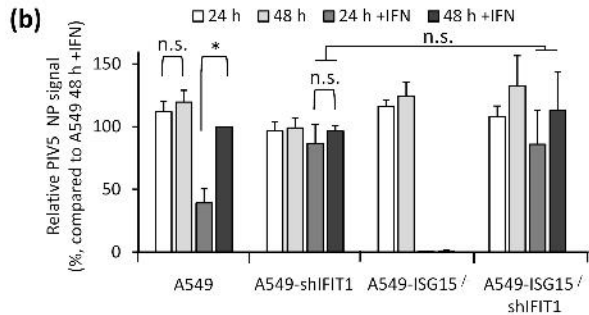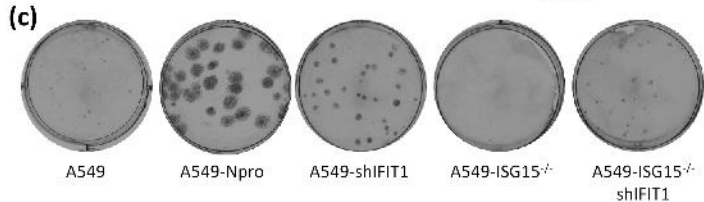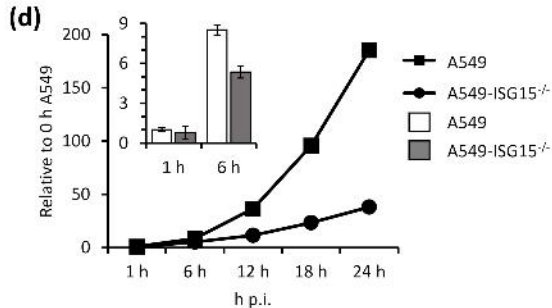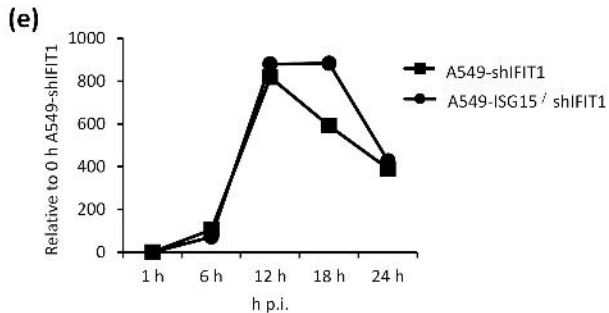

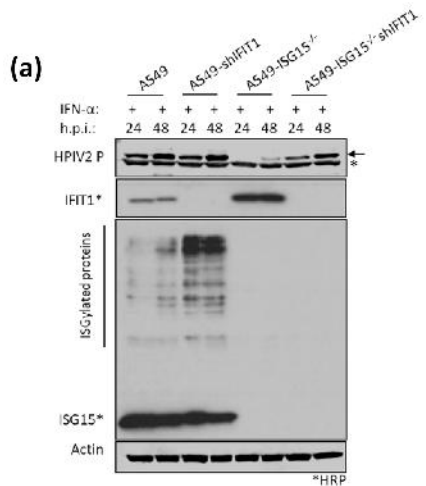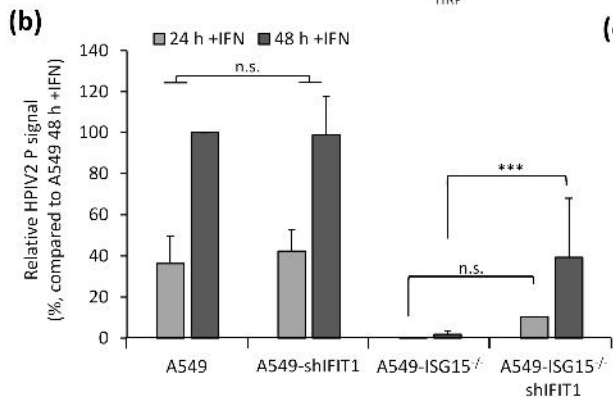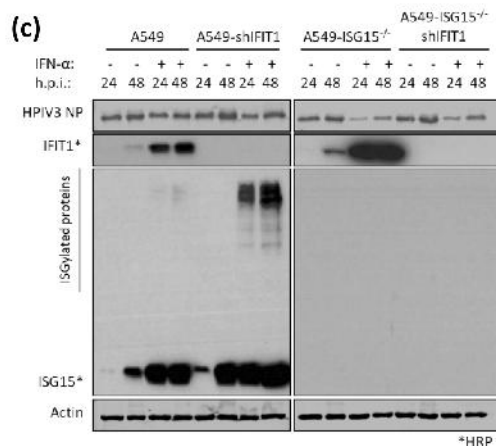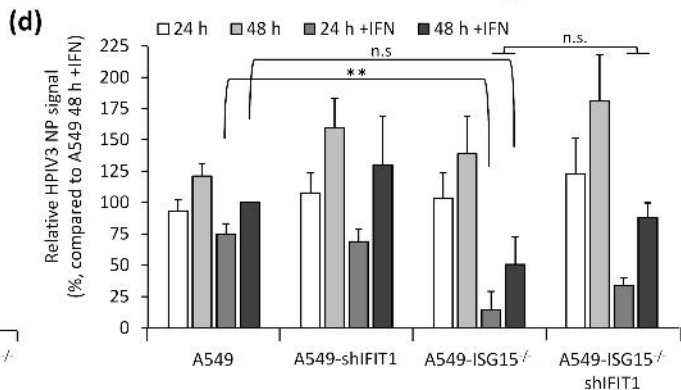

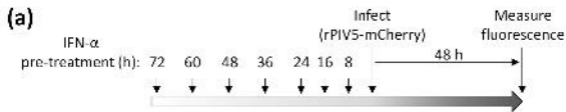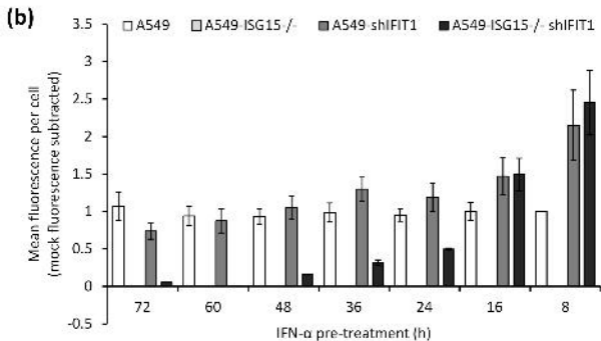

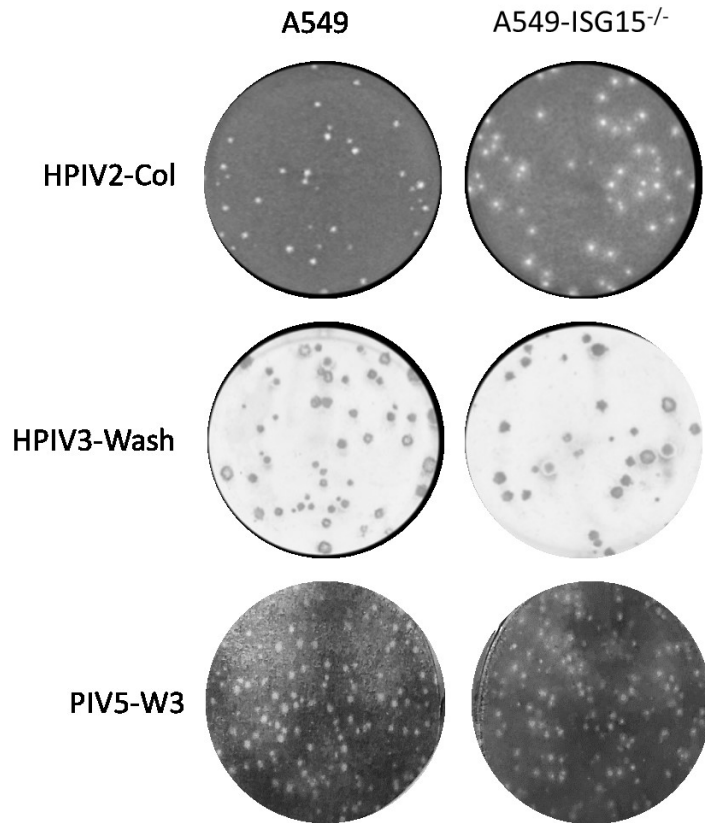

**Supplementary Figure 1.** No viral resistance in naïve ISG15-deficient cells. Near confluent A549 or A549-ISG15<sup>-/-</sup> (B8) cells in 6-well plates were infected with the indicated virus at dilution that allow the formation of discrete plaques. Following 6 days infection, cells were fixed and either stained with toluidine blue O (HPIV2 strain Collindale and PIV5 strain W3-infected cells) or immunostained (HPIV3 strain Washington using antibodies specific for HPIV3 nucleoprotein).
